# Supplementary material for: Remember rhythm and rime:Memory and narratives in science communication
Source: Copernicus journal article supplement (doi:10.5194/gc-2020-20), 2020-06-15
Supplement: Supplementary file [file gc-2020-20-AC2-supplement.pdf]

Dear Sarah,

I found very interesting and useful your comments. Thank you very much!

Here I will comment on each of them:

- 1) Narrative is now introduced and defined earlier in the document.
- 2) Rhyme is the right word, thanks!
- 3) Abstract was modified according to your suggestions
- 4) Bartlett's experiment is now explained.
- 5) The citations that were missing are now included
- 6) Paragraphs were organized according to your comments
- 7) Models is a section now on its own
- 8) The section on Narratives as mnemonic devices was broken up and incorporated throughout the manuscript (this was the original arrangement but the previous referee suggested to change it and create the section on Narratives as mnemonic devices).
- 9) Short-term and Long-term were corrected.
- 10) For me the problem regarding British and American English is confusing, as I am not a native speaker. I use normally British corrector (because I did my PhD in Britain). For British English the corrector accept both: organization and organisation. I checked the rest of the document with the British option and I changed the few spelling mistakes that the corrector marked as incorrect, but I am not sure if there are more mistakes.
- 11) The idea of introducing an interactive "exercise" with the reader is really interesting! However I did not write this paper with this idea in mind, I believe I will, no doubt, do this in the future but I need to create the paper right from the beginning with this intention in mind. Thanks again, is a wonderful idea making the paper a ludic one!
- 12) My experience with figures has been rather difficult because the ones available in the internet, most of them have copyright and I currently do not have access to a designer to create my own.

Thanks again for your comments. In my opinion the paper improved significantly thanks to your help!
